# Supplementary material for: Ruthenium nanoparticles supported on S-doped graphene as an efficient HER electrocatalyst
Source: Royal Society of Chemistry journal article supplement (doi:10.1039/d1nj04765e), 2021-01-01
Supplement: d1nj04765e1.pdf [file d1nj04765e1.pdf]

*Supporting information*

**Ruthenium Nanoparticles Supported on S-doped Graphene  
as an Efficient HER Electrocatalyst**

Hai-Lang Jia,<sup>\*a</sup> Cheng-Lin Guo,<sup>b</sup> Rui-Xin Chen,<sup>a</sup> Jiao Zhao,<sup>a</sup> Rui Liu<sup>a</sup> and Ming-Yun Guan<sup>a</sup>

<sup>a</sup>School of Chemical and Environmental Engineering, Institute of Advanced Functional Materials  
for Energy, Jiangsu University of Technology, Changzhou 213001, P. R. China.

<sup>b</sup>CMCU Engineering Co., Ltd., Chongqing, 400030, P. R. China.

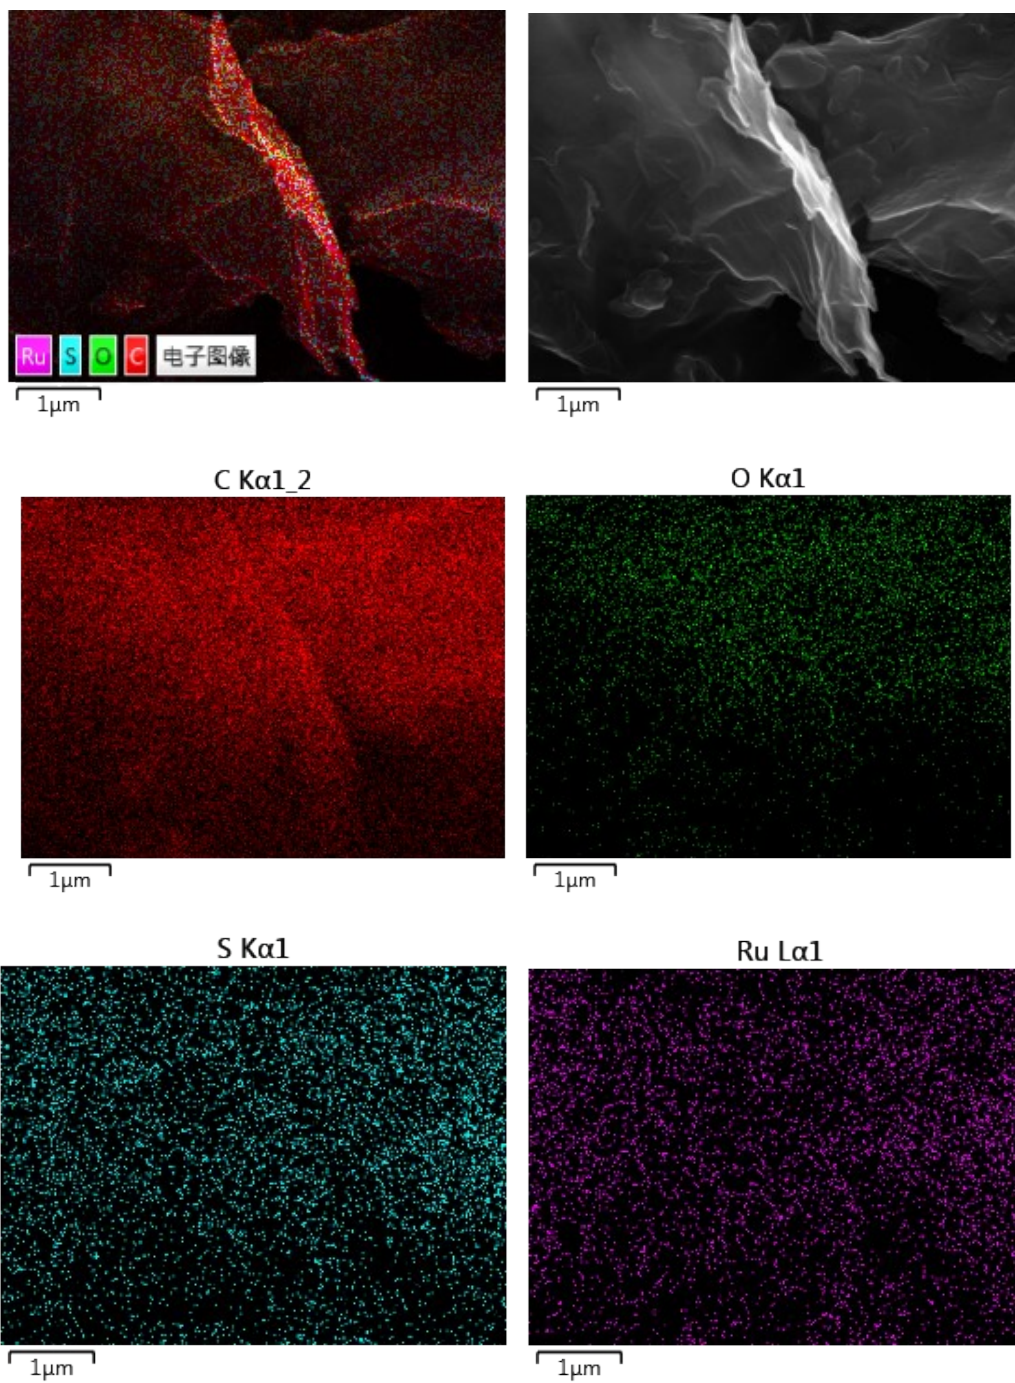

**Fig. S1** EDS mapping of Ru@SGO

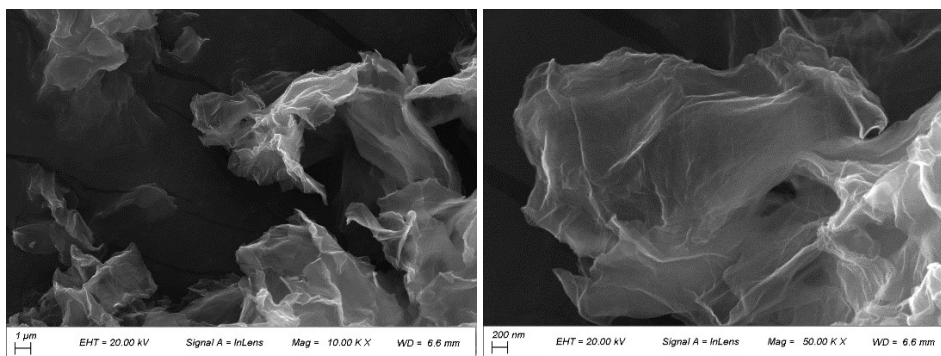

Fig. S2 SEM of Ru@GO

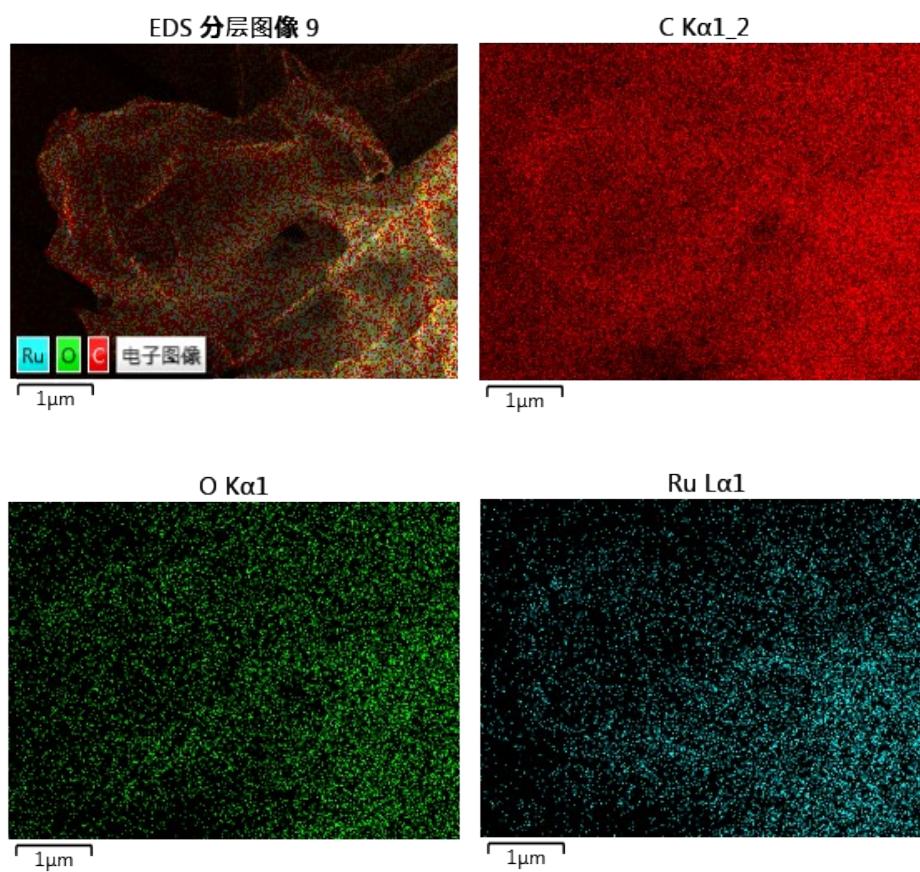

Fig. S3 EDS mapping of Ru@GO

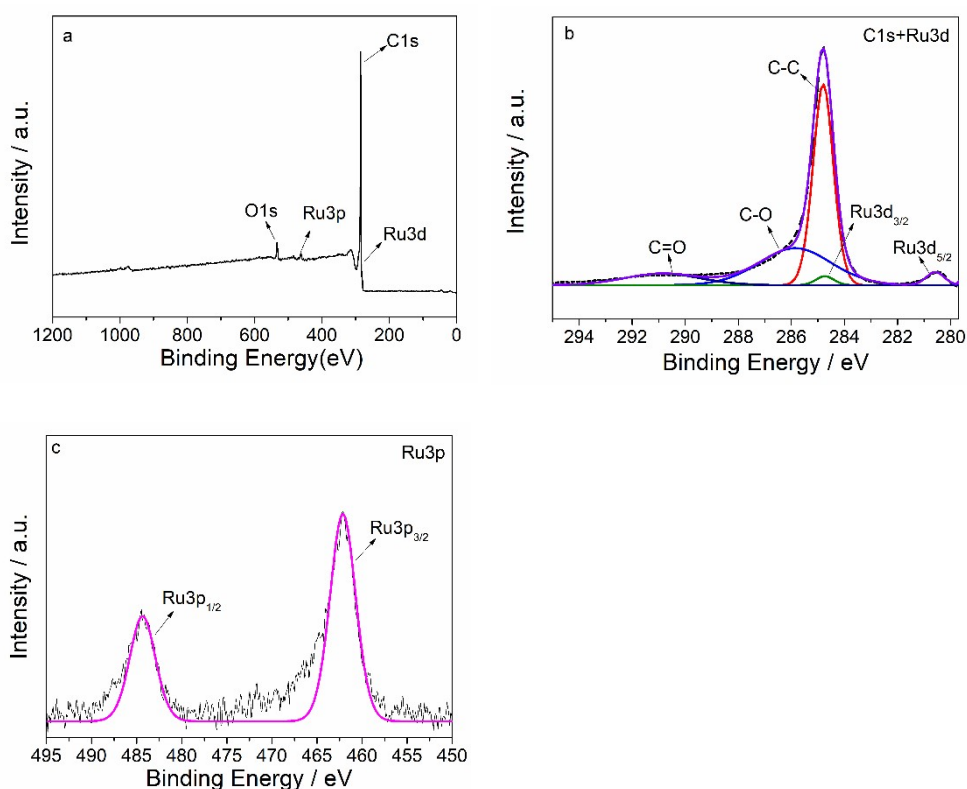

**Fig. S4** (a) XPS survey spectra of Ru@GO, (b-c) high-resolution XPS spectra of C1s+Ru3d, Ru3p.

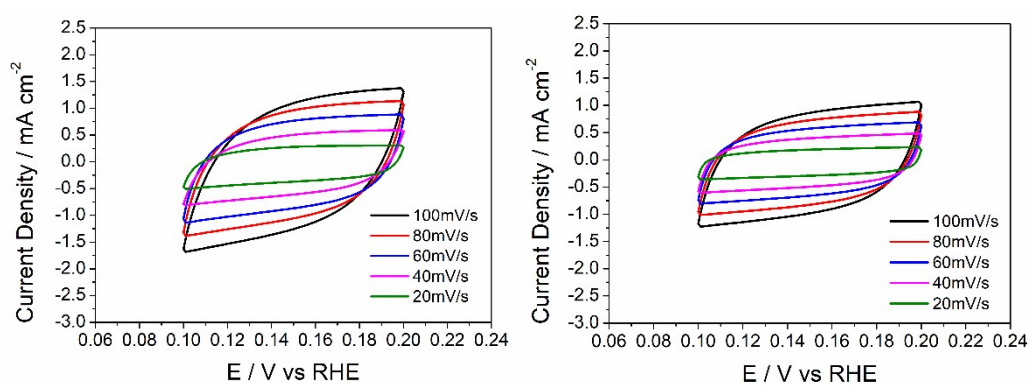

**Fig. S5** CV curves of Ru@GO at various scan rates, (left) 1 M KOH, (right) 0.5 M H<sub>2</sub>SO<sub>4</sub>



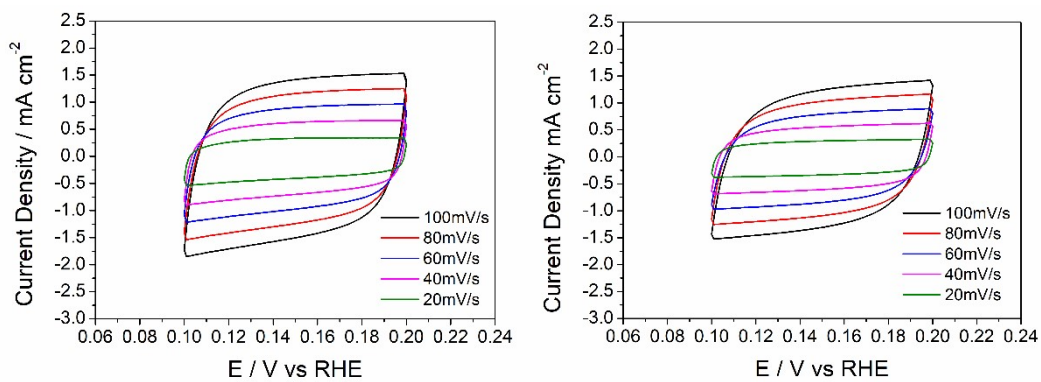

**Fig. S6** CV curves of Ru@SGO at various scan rates, (left) 1 M KOH, (right) 0.5 M H<sub>2</sub>SO<sub>4</sub>

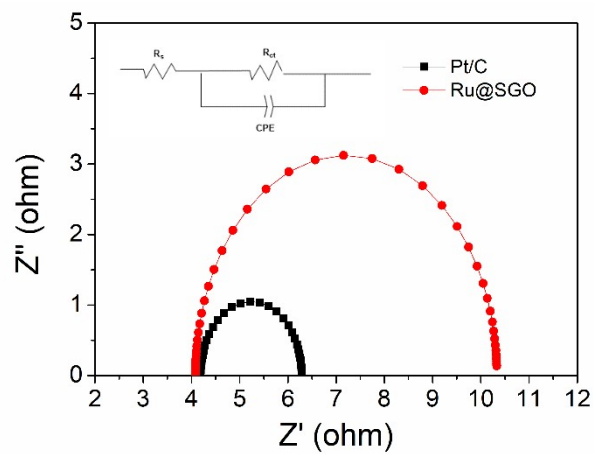

**Fig. S7** EIS of Ru@SGO and Pt/C in 1 M KOH.

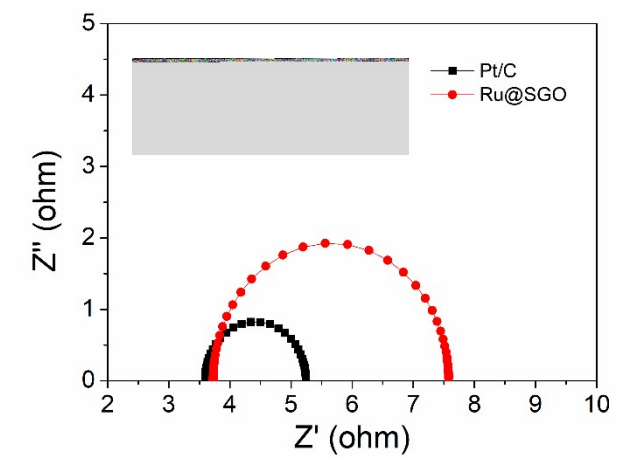

**Fig. S8** EIS of Ru@SGO and Pt/C in 0.5 M H<sub>2</sub>SO<sub>4</sub>.

**Table S1.** HER catalytic activities of Ru@SGO and some other catalysts reported in recent literatures (at 10 mA cm<sup>-2</sup> for HER in 0.5 M H<sub>2</sub>SO<sub>4</sub>).

| Catalysts                                                                   | HER Overpotential @10 mA cm <sup>-2</sup> (mV) | Tafel Slope (mV dec <sup>-1</sup> ) | Ref.                                                  |
|-----------------------------------------------------------------------------|------------------------------------------------|-------------------------------------|-------------------------------------------------------|
| Ru@SGO                                                                      | 69                                             | 52                                  | In this work                                          |
| CoWP-CA/KB                                                                  | 111                                            | 58                                  | ACS Sustainable Chem. Eng., 2021, 9, 36, 12311-12322. |
| CoSAs/PTF-600                                                               | 94                                             | 50                                  | J. Mater. Chem., A, 2019, 7, 1252.                    |
| MoS <sub>2</sub> -60s                                                       | 131                                            | 48                                  | J. Am. Chem. Soc., 2020, 142, 4298.                   |
| s-RuS <sub>2</sub> /S-rGO                                                   | 69                                             | 64                                  | ACS Appl. Mater. Interfaces, 2018, 10, 34098.         |
| L-Ag                                                                        | 136                                            | 71                                  | Nature Catalysis, 2020, 2, 1107.                      |
| RuP <sub>2</sub> /1.03CDs-900                                               | 100                                            | 61                                  | ACS Sustainable Chem. Eng., 2020, 8, 3995–4002.       |
| Ni-WP2 NS/CC                                                                | 110                                            | 65                                  | Journal of Energy Chemistry, 2021, 55, 17-24.         |
| WC1-X                                                                       | 247                                            | /                                   | ACS Appl. Energy Mater., 2020, 3, 1082.               |
| ZnCo/NC@MoS <sub>2</sub>                                                    | 130                                            | 60                                  | Electrochim. Acta, 2020, 331, 135445-135454.          |
| B12/G800A                                                                   | 115                                            | 65                                  | J. Mater. Chem. A, 2019, 7, 7179.                     |
| Mo-W-P/CB                                                                   | 165                                            | 63                                  | J. Coord. Chem., 2020, 73, 2590-2601.                 |
| FePc-MoS <sub>2</sub>                                                       | 123                                            | 32                                  | Nanoscale, 2019, 11, 14266.                           |
| Pd/Nb <sub>2</sub> C-HF                                                     | 34                                             | 34                                  | Catal. Today, 2021, 368, 187-195.                     |
| Pt-MXene-CNTs                                                               | 62                                             | 78                                  | Adv. Funct. Mater., 2020, 30, 2000693.                |
| S-Doped MoP Nanoporous Layer                                                | 117                                            | 34                                  | ACS Catal., 2019, 9, 651.                             |
| Pd <sub>35</sub> Pt <sub>19</sub> Cu <sub>46</sub> /Ti <sub>2</sub> CTx-CNT | 4                                              | 18                                  | J. Mater. Chem. A, 2021, 9, 23085-23094.              |
| CrB <sub>2</sub>                                                            | 355                                            | 78                                  | Inorg. Chem. Front., 2021, DOI:10.1039/D1QI00496D.    |

**Table S2.** HER catalytic activities of Ru@SGO and some other catalysts reported in recent literatures (at 10 mA cm<sup>-2</sup> for HER in 1 M KOH).

| Catalysts                                                 | HER Overpotential @10 mA cm <sup>-2</sup> (mV) | Tafel Slope (mV dec <sup>-1</sup> ) | Ref.                                              |
|-----------------------------------------------------------|------------------------------------------------|-------------------------------------|---------------------------------------------------|
| Ru@SGO                                                    | 33                                             | 56                                  | In this work                                      |
| MoP@NCHSs                                                 | 92                                             | 62                                  | Angew. Chem. Int. Ed., 2019, 58, 2.               |
| NiFe-LDH-Co <sub>3</sub> O <sub>4</sub> /NF               | 162                                            | 105                                 | Chem. Eur. J., 2021, 27, 3367-3373.               |
| MoS <sub>2</sub> /CoNi <sub>2</sub> S <sub>4</sub>        | 78                                             | 67                                  | Adv. Funct. Mater., 2020, 30, 1908520.            |
| Co <sub>3</sub> S <sub>4</sub> @FNC-Co <sub>3</sub>       | 140                                            | 103                                 | Carbon, 2020, 160, 133.                           |
| MoS <sub>2</sub> /NiS                                     | 244                                            | 97                                  | Small, 2019, 15, 1803639.                         |
| Ru-NiFeP/NF                                               | 56                                             | /                                   | Applied Surface Science, 2021, 536, 147952.       |
| Fe <sub>1.0</sub> CO <sub>1.1</sub> Ni <sub>1.4</sub> -NC | 175                                            | 76                                  | J. Mater. Chem. A, 2020, 8, 9021-9031.            |
| Ru <sub>1</sub> Co <sub>2</sub> NP                        | 188                                            | /                                   | ACS Applied Energy Materials, 2020, 3, 1869-1874. |
| Rh-Rh <sub>2</sub> P@C                                    | 37                                             | 32                                  | J. Mater. Chem. A, 2020, 8, 12378.                |
| MoPS                                                      | 158                                            | 52                                  | Appl. Catal. B-Environ., 2019, 245 656.           |
| MoS <sub>2</sub> -Mo <sub>2</sub> C/Mo                    | 56                                             | /                                   | Chem. Commun., 2021, DOI:10.1039/D1CC04431A.      |
| RuP <sub>2</sub> @PC                                      | 79                                             | 37                                  | J. Mater. Chem. A, 2021, 9, 12276-12282.          |
| FF-NaCl-Ir-P                                              | 69                                             | /                                   | J. Mater. Chem. A, 2021, 9, 12074-12079.          |
| Co-Mo-P/Co-Zn-S                                           | 120                                            | 62                                  | Nanoscale, 2021, DOI:10.1039/D1NR04374A.          |
| Ru/NiFe LDH-F/NF                                          | 116                                            | /                                   | Applied Surface Science, 2020, 528, 146972.       |
| Ru/PEI-XC                                                 | 13                                             | /                                   | J. Mater. Chem. A, 2021, 9, 22934-22942.          |
